# Supplementary material
Source: PubMed Central journal article supplement (PMC5173467)
Supplement: supp_4.4.E668_2016-0047_Original_submission.pdf [file supp_4.4.E668_2016-0047_Original_submission.pdf]

## Performance of a quantitative Fecal Immunochemical Test in a Colorectal Cancer Screening Pilot Program

### **Abstract**

#### **Background:**

Colorectal cancer (CRC) is a major public health issue in Canada and all ten provinces have commenced or are planning CRC screening programs. British Columbia (BC) undertook a CRC screening pilot program, Colon Check, in three communities using a fecal immunochemical test (FIT) from January 1, 2009 to March 31, 2013. There are limited North American data on CRC screening program outcomes using FIT. Our objective was to assess the performance of a quantitative FIT in the detection of colorectal neoplasia in a population-based screening program.

#### **Methods:**

Data was collected prospectively into a central database in a cohort of asymptomatic, average risk 50 to 74 year old men and women participating in Colon Check. The primary screening test was biennial two specimen quantitative FIT with a cut-off of 100 ng/mL buffer with follow-up colonoscopy if either test was positive. Participant demographics, FIT results, colonoscopy quality indicators, and pathology results were reviewed. Pathology per participant was classified by the most significant lesion detected. Non-screen detected CRC was assessed through the BC Cancer Registry.

#### **Results:**

16,234 individuals completed a first round of FIT with a positivity rate of 8.6% and 5305 (86.0% of eligible) completed a second round of FIT with a positivity rate of 6.7%. Of the 1756 with a positive FIT, 1555 underwent colonoscopy (88.6%). The detection rate of FIT for CRC was 3.5 per 1000 participants. The positive predictive value of FIT for CRC, high risk polyps and all neoplasia was 5.0% (95% CI 3.8-6.0%), 34.8% (95%CI 32.5-37.2%) and 62.0% (95%CI 59.6-64.4%), respectively. The number needed to screen to detect one CRC was 283, to detect one high risk polyp was 40 and to detect any neoplasia was 22.

#### **Interpretation:**

Biennial screening with a two sample quantitative FIT surpassed current benchmarks for neoplasia detection in population-based CRC screening.

## **Background**

Colorectal cancer (CRC) is the second leading cause of cancer and cancer death in Canadian men and the third in Canadian women (1). Randomized, controlled trials have demonstrated that colon screening with the guaiac fecal occult blood test can decrease CRC incidence(2) and mortality(3). Analyses show that screening average risk individuals for CRC is cost-effective at acceptable levels of 3<sup>rd</sup> party payers willingness to pay (4). The Canadian Task Force on Preventative Health Care has recommended that screening be offered to individuals 50-74 years of age using a fecal occult blood test biennially, preferably in an organized screening program(5).

The fecal immunochemical test (FIT) is an immunologic test consisting of monoclonal or polyclonal antibodies directed against human globin. The FIT is more sensitive and specific than the guaiac fecal occult blood test and participation rates are higher for FIT than for guaiac fecal occult blood test(6), flexible sigmoidoscopy(7) or colonoscopy(8). It is the primary screening test for eight of the provincial programs.

From January 2009 to April 2013, the BC Cancer Agency oversaw a CRC screening program pilot in three communities using a quantitative biennial FIT. Our objective is to evaluate the performance of a 2-specimen quantitative FIT at a cut-off of 100 ng/mL buffer in the detection of CRC and pre-cancerous polyps in an average risk Canadian population.

## **Methods**

### **Participants**

Three BC communities participated in Colon Check: Penticton from January 2009, Powell River from October 2009 and downtown Vancouver from April 2010. The Colon Check program completed screening on March 31, 2013. Eligible participants were mailed invitations using the BC Medical Services Plan database and recruited by family doctors or through local publicity. Participants were then registered by a central call center.

### **Inclusion Criteria:**

- 1) Age 50-74 years
- 2) Asymptomatic
- 3) Resident and/or primary care provider in a Colon Check community

### **Exclusion Criteria:**

- 1) Rectal bleeding
- 2) Personal history of CRC
- 3) Personal history of inflammatory bowel disease
- 4) Colonoscopy or sigmoidoscopy within the last 5 years

1  
2  
3 Individuals with ~~one or more first degree relatives a family history of~~with colorectal  
4 ~~cancer~~CRC were ~~identified at the time of registration offered primary screening~~  
5 ~~colonoscopy~~ and their results will ~~be~~ reported separately.  
6  
7

### 8 Screening Test

9 The primary screening test was a semi-automated FIT, OC-Auto Micro 80  
10 (Polymedco Inc., New York, USA). Participants received two FIT kits in the mail and  
11 were instructed to take one sample each from two consecutive bowel movements.  
12 Once complete, participants returned the kits to a local laboratory for transport to  
13 the central Vancouver lab for analysis. The ~~FIT~~ screening episode was considered  
14 abnormal if either test was  $\geq 100$  ng/mL buffer (20 micrograms/mL feces). If the  
15 ~~FIT~~ episode was abnormal, then colonoscopy was recommended.  
16  
17  
18

### 19 Colonoscopy and Pathology

20  
21 A trained Registered Nurse Navigator assessed all patients prior to colonoscopy for  
22 medical fitness, to provide patient education, and to relay bowel preparation  
23 instructions. Colonoscopy was performed in the usual manner by community  
24 colonoscopists. A standard reporting form was used to collect colonoscopy quality  
25 indicators, polyp morphology and mode of polypectomy. Tissue specimens were  
26 assessed by BC Cancer Agency pathologists and reported in a standardized format.  
27  
28  
29

30 High-risk polyps (HRP) were defined as tubular adenomas  $\geq 10$  mm in size,  
31 tubulovillous or villous adenomas, adenomas with high grade dysplasia, sessile  
32 serrated adenomas, traditional serrated adenomas, and multiple ( $\geq 3$ ) tubular  
33 adenomas less than 10 mm in size. Low risk pre-cancerous polyps (LRP) were  
34 defined as one or two tubular adenomas less than 10 mm in size. Non-screen  
35 detected CRC was defined as cancers diagnosed before or within six months ~~of~~  
36 ~~following following(?)~~ the next recommended screening or surveillance interval.  
37  
38  
39

40 The colonoscopy and pathology results were communicated to the participant's  
41 family physician, the colonoscopist, the patient Navigator, and Colon Check. The  
42 Navigator conducted a telephone interview 2 to 4 weeks following the colonoscopy  
43 to assess for delayed adverse events, to inform the participant of the pathology  
44 results and re-screening or surveillance interval. Participants in whom a neoplastic  
45 lesion was detected at colonoscopy were recalled for colonoscopy in five years for  
46 LRP(s) and three years for HRPs. If CRC or inflammatory bowel disease was  
47 identified, then the participant was discharged from Colon Check for ongoing  
48 management under the care of their colonoscopist. Participants with a positive FIT  
49 and a negative colonoscopy were recalled for FIT in two years. All adverse events  
50 were reviewed by the quality assurance committee and labeled serious or not  
51 serious as well as probably, possibly or unlikely related to the colonoscopy. A  
52 serious adverse event was defined as an adverse event resulting in a repeat  
53 colonoscopy, surgery, hospital admission or death.  
54  
55  
56  
57

### 58 Data Collection and Analysis

1  
2  
3  
4  
5 All data was collected prospectively from participants, colonoscopists and  
6 pathologists and entered into a central database at the BC Cancer Agency including:  
7 participant demographics, FIT results, colonoscopy results, pathology results and  
8 adverse events. There is mandatory reporting of all cancers diagnosed in BC to the  
9 British Columbia Cancer Registry. The Cancer Registry was reviewed in April 2015  
10 to assess for the development of interval CRC in Colon Check participants.  
11

12  
13 The primary objective of this study is to determine the positive predictive value of a  
14 2-sample FIT with a cut-off of 100 ng/mL for colorectal neoplasia in a Canadian  
15 population. The secondary objectives are to compare the incidence and stage of  
16 colorectal cancer in Colon Check compared to the general population in BC.  
17

18  
19 The BC Cancer Agency Research Ethics Board approved this study.  
20

## 21 Results

22  
23  
24 Of approximately 95,000 eligible individuals, 16,234 (17.1%) successfully  
25 completed a first round of screening with FIT (Figure 1). FIT was unsatisfactory for  
26 analysis in 1.3% of individuals. The mean age of the screening participants was 62  
27 years (SD 7) and 51% were female. The FIT was positive in 1395 (8.6%)  
28 participants. The positivity rate was higher with increasing age and for male gender  
29 (Figure 24). Of the 6,255 participants who underwent screening prior to April 1,  
30 2011, and were eligible to complete a second round of screening in the Colon Check  
31 program, 5,378 (86%) completed the second round and the positivity rate for the  
32 second round of screening was 6.7% (n=361).  
33  
34

35  
36 Of those 1756 participants with a positive FIT, 1555 (88.6%) underwent 1597  
37 colonoscopies. The overall cecal intubation rate was 96% (95% CI: 95%, 97%) and  
38 the overall bowel preparation adequacy was 97.4% (95% CI: 96.6%, 98.1%). Of the  
39 1597 colonoscopies performed, 47(2.9%) resulted in a serious adverse event  
40 probably or possibly related to the procedure. There were 3 (0.19%) colon  
41 perforations (1 immediate and 2 delayed) and 26 (1.6%) post-polypectomy  
42 hemorrhages. There were no deaths in the 30 days following colonoscopy.  
43  
44

45  
46 Of the 1597 colonoscopies performed, 1156 (72.5%) had at least one specimen with  
47 a total of 2,855 specimens submitted to pathology. There were 2040 colorectal  
48 neoplasms detected in 1555 participants undergoing colonoscopy including 76  
49 colorectal adenocarcinomas. The pathology results, classified by the most significant  
50 finding per colonoscopy are shown in the Table. The number needed to screen with  
51 FIT to detect one CRC is 283, to detect one HRP is 40 and to detect any neoplasm is  
52 22. The number needed to colonoscope is 21 to detect one CRC, 3 to detect one HRP  
53 and 2 to detect any neoplastic lesion amongst individuals with a positive FIT.  
54  
55

56  
57 Colon Check participant follow-up in the BC Cancer Registry was conducted on June  
58 9, 2015. The median follow-up from the last screening episode (FIT or colonoscopy)  
59  
60

1  
2  
3 was 47 months (range 23-76 months). There were nine non-screen detected cancers  
4 identified in Colon Check participants. One patient had CRC diagnosed at the site of a  
5 previous polypectomy of a high-risk polyp two months prior to scheduled  
6 colonoscopy surveillance. The remaining eight participants had a negative FIT test  
7 within the 30 months preceding cancer diagnosis. The median FIT value of the 18  
8 FITs performed in the nine participants with interval cancer was 8.5 ng/mL buffer  
9 (range 0-71). The TMN stage was: stage I in two, stage II in two, stage III in three  
10 and stage IV in two.  
11  
12

13  
14 The stage distribution of the CRCs diagnosed in Colon Check, including screen  
15 detected and interval cancers, compared to the general BC population is shown in  
16 Figure [32](#).  
17

### 18 19 **Interpretation:**

20  
21 The first FIT was approved in 2008 by Health Canada and reimbursed by the BC  
22 Medical Services Plan beginning April 1, 2013. There are several brands available,  
23 both quantitative and qualitative, which may have different test performance  
24 characteristics. The sensitivity and specificity of the FIT may depend on the brand  
25 used (9)(10), the underlying cancer risk in the population being tested, the number  
26 of stool specimens tested in each screening round (11), the cut-off chosen for  
27 positivity(12), the screening interval, and the quality of the follow-up colonoscopy.  
28 The results from randomized controlled trials demonstrating that screening with  
29 guaiac fecal occult blood tests decreases the mortality and incidence of CRC are  
30 often extrapolated to FIT; however, FIT has not been evaluated in this manner.  
31 There are surrogate data demonstrating that participating in a FIT screening  
32 program will result in CRC diagnosis at an earlier stage of disease as compared to  
33 the non-participants(13), that participants of a FIT-based CRC screening program  
34 will have a lower CRC associated mortality as compared to the general population  
35 (9), and that participants in subsequent rounds of FIT screening have a lower  
36 incidence of CRC than earlier rounds(14). An important advantage of the FIT is that  
37 participation is higher than with the guaiac fecal occult blood test, (6)(7) flexible  
38 sigmoidoscopy, (7) or colonoscopy(8).  
39  
40  
41  
42  
43

44 In the current study, we assessed the performance of a two specimen quantitative  
45 FIT with a cut-off of 100 ng/mL in the detection of colorectal neoplasia. The positive  
46 predictive value for pre-cancerous polyps was 57% surpassing the national  
47 benchmark of 50% derived through expert consensus by the Canadian Partnership  
48 Against Cancer (CPAC). Major et al published results (including preliminary Colon  
49 Check data) from five of the provincial CRC screening programs reporting an  
50 adenoma detection rate of 16.9 per 1000 screened and a CRC detection rate of 1.8  
51 per 1000 screened (15). The detection rate for Colon Check was 3.5 cancers per  
52 1000 screened and 41.2 adenomas per 1000 screened. The lower rates observed in  
53 the national report are due to the use of different fecal tests by other provinces,  
54 some with a lower sensitivity. The CRC screening program in Tuscany reported a  
55 detection rate of 4.5 per 1000 screened with a FIT(16).  
56  
57  
58  
59  
60

1  
2  
3  
4  
5  
6  
7  
8  
9  
10  
11  
12  
13  
14  
15  
16  
17  
18  
19  
20  
21  
22  
23  
24  
25  
26  
27  
28  
29  
30  
31  
32  
33  
34  
35  
36  
37  
38  
39  
40  
41  
42  
43  
44  
45  
46  
47  
48  
49  
50  
51  
52  
53  
54  
55  
56  
57  
58  
59  
60

In Colon Check, the manufacturer's recommended cut-off of 100 ng/mL buffer was used; however, a jurisdiction may chose a different cut-off for positivity which will alter the sensitivity of the test. For instance, the French CRC screening program also used two specimens per screening round with the same brand of FIT as Colon Check but at a higher cut-off of 150 ng/mL buffer(10). As expected, the positivity rate was lower at 4% compared to 8.7% in Colon Check and the positive predictive value for CRC was higher at 6.2% compared to 5.0%. The number needed to screen to detect one CRC was 450 and the number needed to colonoscopy to detect one CRC was 16 compared to 283 and 21 in Colon Check.

Non-screen detected CRC were discovered 0.55/1000 Colon Check participants; in eight participants following a negative FIT and in one participant following polypectomy of an advanced adenoma. Our results are similar to the Tuscan screening program which reported non-screen detected CRC in 0.54/1000 screened(16). This study is the first report of non-screen detected CRC in a North American screening program and, to our knowledge, only the second report world-wide.

There was a shift in CRC stage distribution between the general BC population and Colon Check participants. The Canadian Community Health Survey of 2012 estimated 49.6% of British Columbians are up to date with CRC screening (17). In the general BC population over the same time period as Colon Check, 36.1% of the cancers diagnosed were Stage I or II while 68% of the cancers diagnosed in Colon Check participants were Stage I or II. This high rate of localized CRC will translate into a future decrease in CRC mortality and is in keeping with data from other Canadian provincial screening programs(15).

Other positive outcomes observed in Colon Check were the low proportion of unsatisfactory FITs and the high participant satisfaction with FIT. Participant compliance with follow-up colonoscopy was 88.6%, which compares favorably with other programs and is due, in part, to the patient navigation incorporated into Colon Check. The provision of additional colonoscopy resources specifically for Colon Check participants avoided usual colonoscopy wait-times and we believe contributed to the high rate of follow-up colonoscopy and high participant satisfaction.

There are several limitations to this study. We were unable to accurately determine participation in Colon Check as individuals who lived outside of the target communities were eligible to participate if their primary care provider practiced within a target community. Using BC census data, we roughly estimate participation in Colon Check at 17%. As individuals with a negative FIT did not undergo colonoscopy, we are unable to measure the false negative rate of FIT in the detection of colorectal neoplasia. Using a two-year follow-up period to determine false negative results for CRC, the FIT sensitivity and specificity for CRC is 91% and 92%, respectively. Limitations of this method include the unknown asymptomatic dwell

1  
2  
3 time of CRC and lag time for cancer reporting into the BC Cancer Registry which  
4 could underestimate the number of interval CRCs. Using follow-up to ascertain FIT  
5 true and false negatives has been shown to yield a higher sensitivity than when  
6 colonoscopy is performed on all subjects (12).  
7  
8

9  
10 In conclusion, programmatic CRC screening of average risk British Columbians with  
11 biennial FIT resulted in a CRC detection rate of approximately 1 in 200 with a  
12 favorable CRC stage shift compared to the general BC population. The participants of  
13 Colon Check will continue CRC screening in the BC Colon Screening Program  
14 launched province-wide on November 15, 2013. Long-term monitoring is ongoing to  
15 assess for the effect of population-based screening on CRC mortality and incidence.  
16  
17  
18  
19  
20  
21  
22  
23  
24  
25  
26  
27  
28  
29  
30  
31  
32  
33  
34  
35  
36  
37  
38  
39  
40  
41  
42  
43  
44  
45  
46  
47  
48  
49  
50  
51  
52  
53  
54  
55  
56  
57  
58  
59  
60

Confidential

**References:**

1. Canadian Cancer Society's Advisory Committee on Cancer Statistics, editor. Canadian Cancer Statistics 2015. Canadian Cancer Society. Toronto, ON; 2015.
2. Mandel JS, Church TR, Bond JH, Ederer F, Geisser MS, Mongin SJ, et al. The effect of fecal occult-blood screening on the incidence of colorectal cancer. *N Engl J Med*. 2000;343(22):1603-7.
3. Hewitson P, Glasziou P, Watson E, Towler B, Irwig L. Cochrane Systematic Review of Colorectal Cancer Screening Using the Fecal Occult Blood Test (Hemoccult): An Update. *Am J Gastroenterol*. 2008 Jun;103(6):1541-9.
4. Telford JJ, Levy AR, Sambrook JC, Zou D, Enns RA. The cost-effectiveness of screening for colorectal cancer. *Can Med Assoc J*. 2010 Sep 7;182(12):1307-13.
5. Bacchus CM, Dunfield L, Gorber SC, Holmes NM, Birtwhistle R, Dickinson JA, et al. Recommendations on screening for colorectal cancer in primary care. *Can Med Assoc J*. 2016;cmaj - 151125.
6. Van Rossum LG, van Rijn AF, Laheij RJ, van Oijen MG, Fockens P, van Krieken HH, et al. Random Comparison of Guaiac and Immunochemical Fecal Occult Blood Tests for Colorectal Cancer in a Screening Population. *Gastroenterology*. 2008 Jul;135(1):82-90.
7. Hol L, van Leerdam ME, van Ballegooijen M, van Vuuren AJ, van Dekken H, Reijerink JCIY, et al. Screening for colorectal cancer: randomised trial comparing guaiac-based and immunochemical faecal occult blood testing and flexible sigmoidoscopy. *Gut*. 2010 Jan 1;59(01):62-8.
8. Quintero E, Castells A, Bujanda L, Cubiella J, Salas D, Lanás Á, et al. Colonoscopy versus Fecal Immunochemical Testing in Colorectal-Cancer Screening. *N Engl J Med*. 2012 Feb 22;366(8):697-706.
9. Chiang T-H, Chuang S-L, Chen SL-S, Chiu H-M, Yen AM-F, Chiu SY-H, et al. Difference in Performance of Fecal Immunochemical Tests With the Same Hemoglobin Cutoff Concentration in a Nationwide Colorectal Cancer Screening Program. *Gastroenterology*. 2014 Dec;147(6):1317-26.
10. Raginel T, Puvinel J, Ferrand O, Bouvier V, Levillain R, Ruiz A, et al. A Population-based Comparison of Immunochemical Fecal Occult Blood Tests for Colorectal Cancer Screening. *Gastroenterology*. 2013 May;144(5):918-25.
11. Rozen P, Comaneshter D, Levi Z, Hazazi R, Vilkin A, Maoz E, et al. Cumulative evaluation of a quantitative immunochemical fecal occult blood test to determine its optimal clinical use. *Cancer*. 2010;NA - NA.



- 1  
2  
3 12. Lee JK, Liles EG, Bent S, Levin TR, Corley DA. Accuracy of Fecal  
4 Immunochemical Tests for Colorectal Cancer: Systematic Review and Meta-  
5 analysis. *Ann Intern Med*. 2014 Feb 4;160(3):171–81.  
6  
7
- 8 13. Zappa M, Castiglione G, Paci E, Grazzini G, Rubeca T, Turco P, et al. Measuring  
9 interval cancers in population-based screening using different assays of fecal  
10 occult blood testing: The district of Florence experience. *Int J Cancer*.  
11 2001;92(1):151–4.  
12  
13
- 14 14. Sakata N, Sakata Y, Shimoda R, Sakata H, Iwakiri R, Fujimoto K, et al. Repeated  
15 screening with fecal immunochemical tests reduced the incidence of colorectal  
16 cancers in Saga, Japan. *Hepatogastroenterology*. 2014 Aug;61(133):1224–8.  
17  
18
- 19 15. Major D, Bryant H, Delaney M, Fekete S, Gentile L, Harrison M, et al. Colorectal  
20 cancer screening in Canada: results from the first round of screening for five  
21 provincial programs. *Curr Oncol*. 2013 Jul 22;20(5):252.  
22  
23
- 24 16. Zappa M, Castiglione G, Paci E, Grazzini G, Rubeca T, Turco P, et al. Measuring  
25 interval cancers in population-based screening using different assays of fecal  
26 occult blood testing: The district of Florence experience. *Int J Cancer*.  
27 2001;92(1):151–4.  
28
- 29 17. Singh H, Bernstein CN, Samadder JN, Ahmed R. Screening rates for colorectal  
30 cancer in Canada: a cross-sectional study. *CMAJ Open*. 2015 Apr 8;3(2):E149–  
31 57.  
32  
33  
34  
35  
36  
37  
38  
39  
40  
41  
42  
43  
44  
45  
46  
47  
48  
49  
50  
51  
52  
53  
54  
55  
56  
57  
58  
59  
60

Table. Pathology findings classified by most significant lesion in 1555 participants undergoing colonoscopy for a positive FIT

| Pathology*          | Number | Positive Predictive Value (95% CI) | Detection Rate per 1000 screened |
|---------------------|--------|------------------------------------|----------------------------------|
| CRC                 | 76     | 5% (3.8-6.0%)                      | 3.5                              |
| Pre-cancerous polyp | 888    | 57.0% (54.7-59.6%)                 | 41.2                             |
| High-risk polyp     | 543    | 35.0% (32.5-37.2%)                 | 25.2                             |
| Low-risk polyp      | 345    | 22.2% (20.1-24.3%)                 | 16.0                             |
| Any neoplasia       | 964    | 62.0% (59.6-64.4%)                 | 44.8                             |

\*Pre-cancerous polyp: adenoma, sessile serrated adenoma/polyp, traditional serrated adenoma. High-risk polyp: tubular adenomas  $\geq 10$  mm in size, tubulovillous or villous adenomas, adenomas with high grade dysplasia, sessile serrated

Confidential

1  
2  
3  
4  
5  
6  
7  
8  
9  
10  
11  
12  
13  
14  
15  
16  
17  
18  
19  
20  
21  
22  
23  
24  
25  
26  
27  
28  
29  
30  
31  
32  
33  
34  
35  
36  
37  
38  
39  
40  
41  
42  
43  
44  
45  
46  
47  
48  
49  
50  
51  
52  
53  
54  
55  
56  
57  
58  
59  
60

Figure 1: Participation in Colon Check

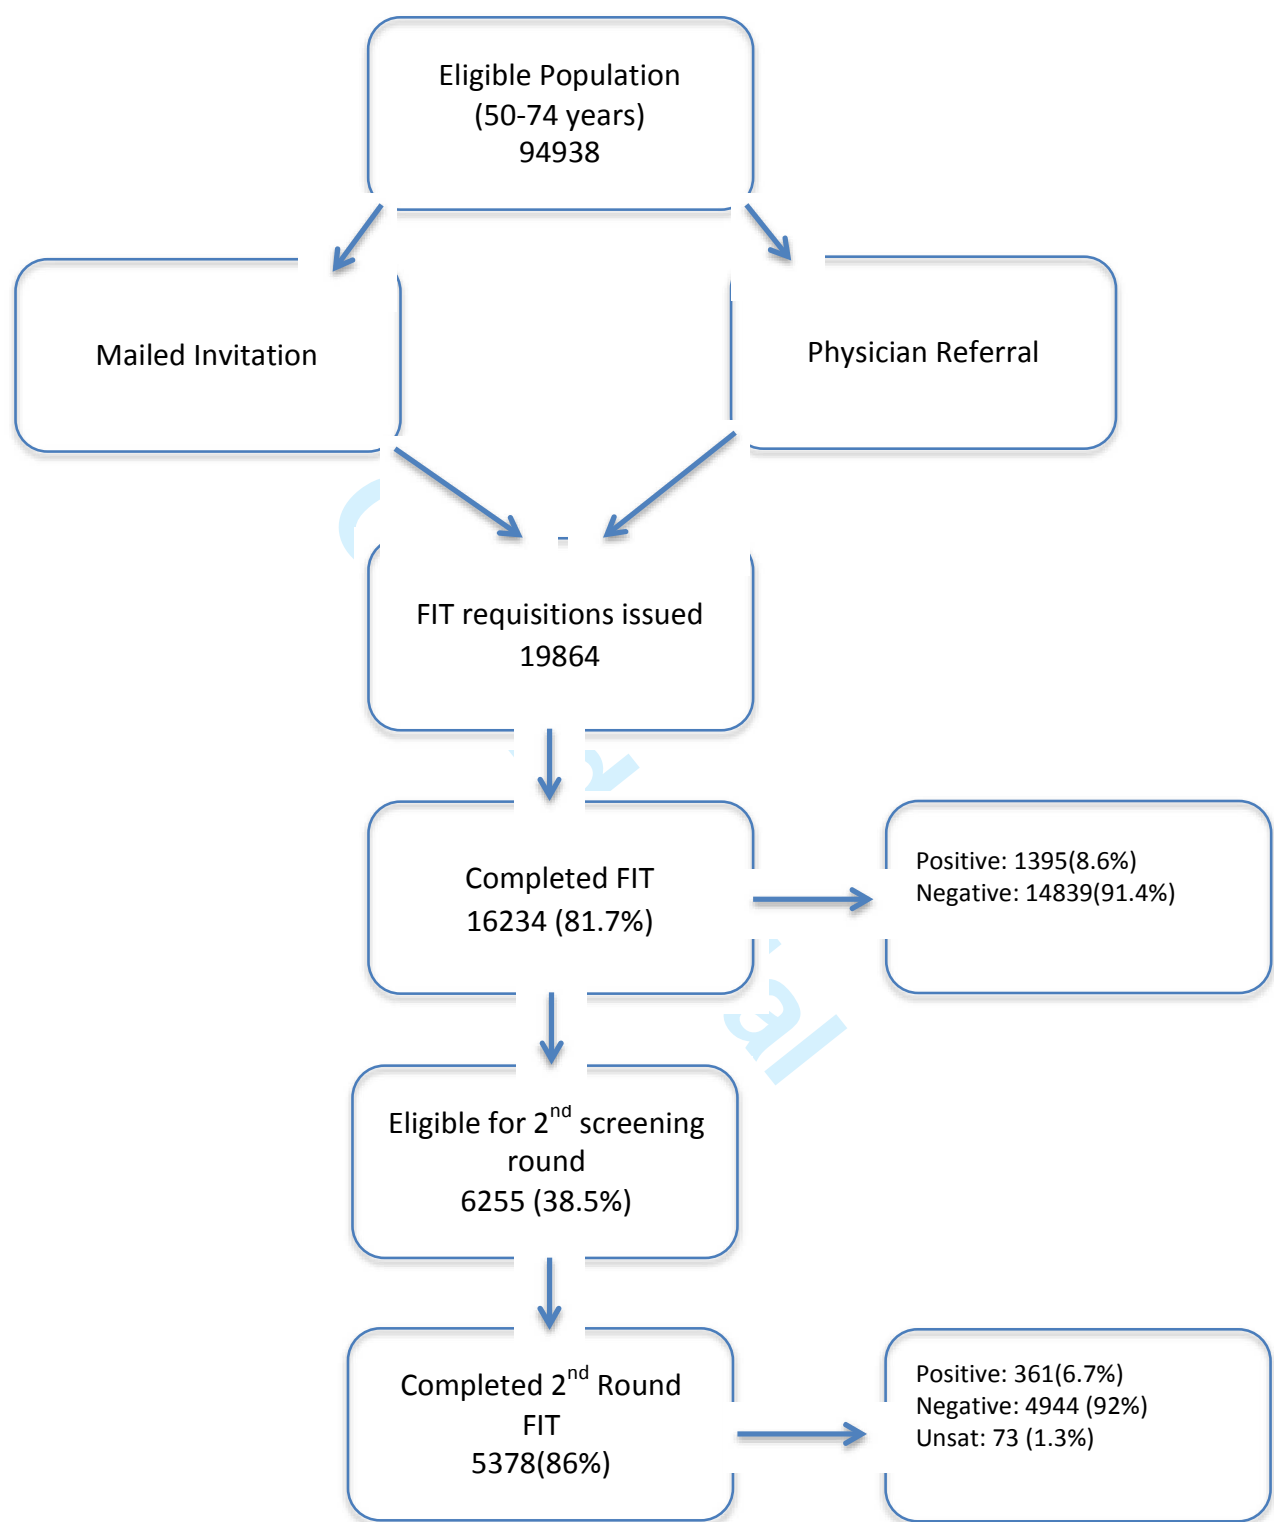

1  
2  
3  
4  
5  
6  
7  
8  
9  
10  
11  
12  
13  
14  
15  
16  
17  
18  
19  
20  
21  
22  
23  
24  
25  
26  
27  
28  
29  
30  
31  
32  
33  
34  
35  
36  
37  
38  
39  
40  
41  
42  
43  
44  
45  
46  
47  
48  
49  
50  
51  
52  
53  
54  
55  
56  
57  
58  
59  
60

Confidential

1  
2  
3  
4  
5  
6  
7  
8  
9  
10  
11  
12  
13  
14  
15  
16  
17  
18  
19  
20  
21  
22  
23  
24  
25  
26  
27  
28  
29  
30  
31  
32  
33  
34  
35  
36  
37  
38  
39  
40  
41  
42  
43  
44  
45  
46  
47  
48  
49  
50  
51  
52  
53  
54  
55  
56  
57  
58  
59  
60

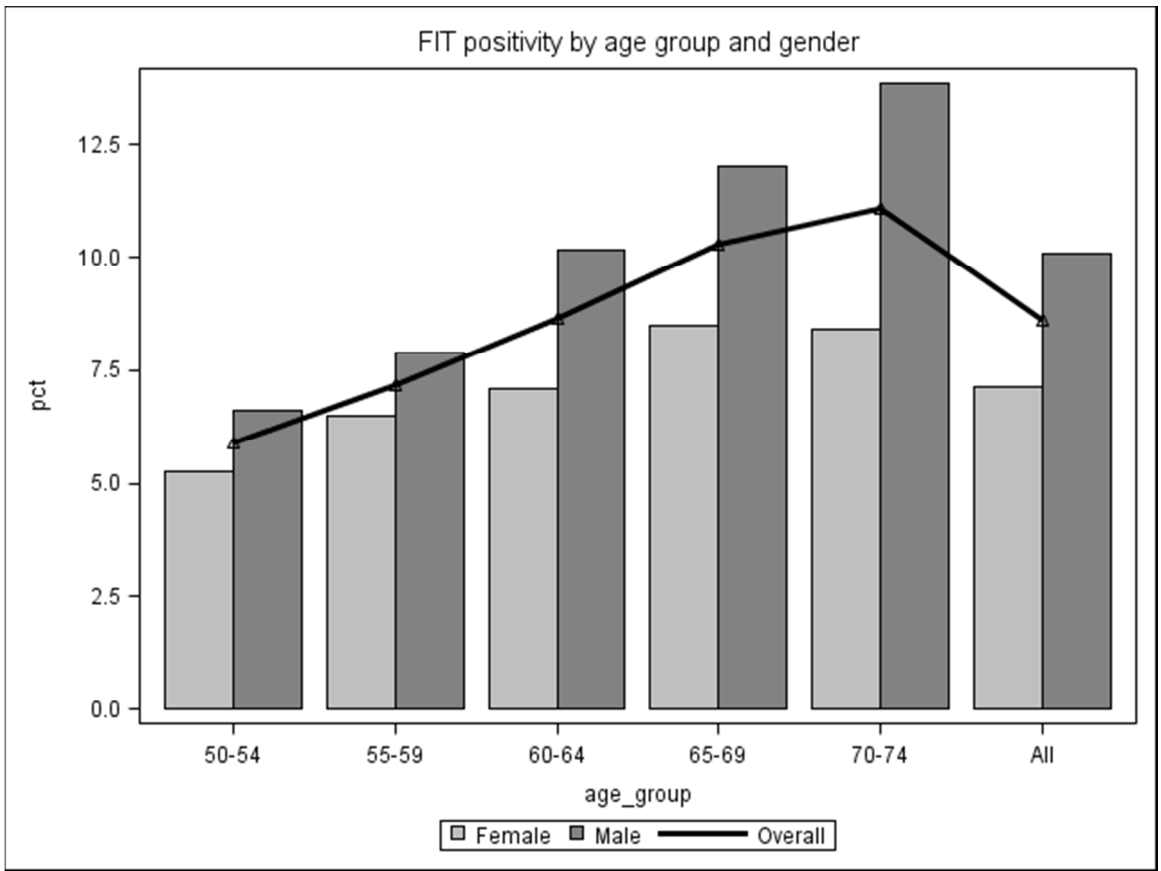

Figure 2. FIT positivity by age and gender

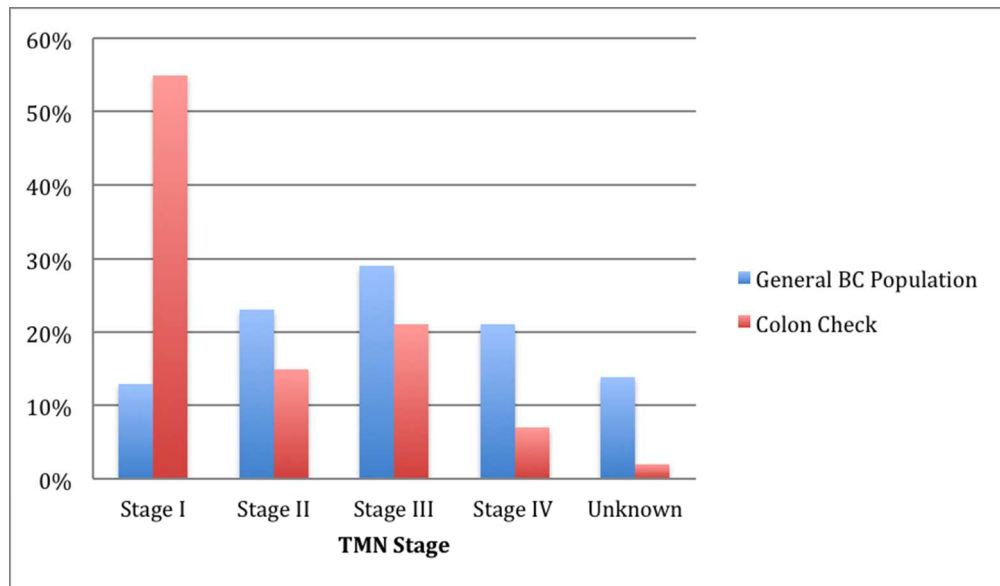

Figure 3. CRC stage distribution for Colon Check and the BC population
